# Supplementary material for: MOF-derived CoNi,CoO,NiO@N–C bifunctional oxygen electrocatalysts for liquid and all-solid-state Zn–air batteries
Source: Royal Society of Chemistry journal article supplement (doi:10.1039/d1nr04537g), 2021-01-01
Supplement: d1nr04537g1.pdf [file d1nr04537g1.pdf]

## Supporting Information

### **MOF-derived CoNi,CoO,NiO@N-C Bifunctional Oxygen Electrocatalysts for Liquid and All-Solid-State Zn–Air Batteries**

Xinde Duan<sup>1</sup>, Shuangshuang Ren<sup>1</sup>, Fayuan Ge<sup>1</sup>, Xukun Zhu<sup>2</sup>, Mingdao Zhang<sup>2</sup> and Hegen Zheng<sup>1\*</sup>

<sup>1</sup>State Key Laboratory of Coordination Chemistry, School of Chemistry and Chemical Engineering, Collaborative Innovation Center of Advanced Microstructures, Nanjing University, Nanjing 210023, PR China

<sup>2</sup>School of Environmental Science and Engineering, Nanjing University of Information Science & Technology, Jiangsu Key Laboratory of Atmospheric Environment Monitoring and Pollution Control, Collaborative Innovation Center of Atmospheric Environment and Equipment Technology, Nanjing 210044, PR China

\* Corresponding author

E-mail: zhenghg@nju.edu.cn

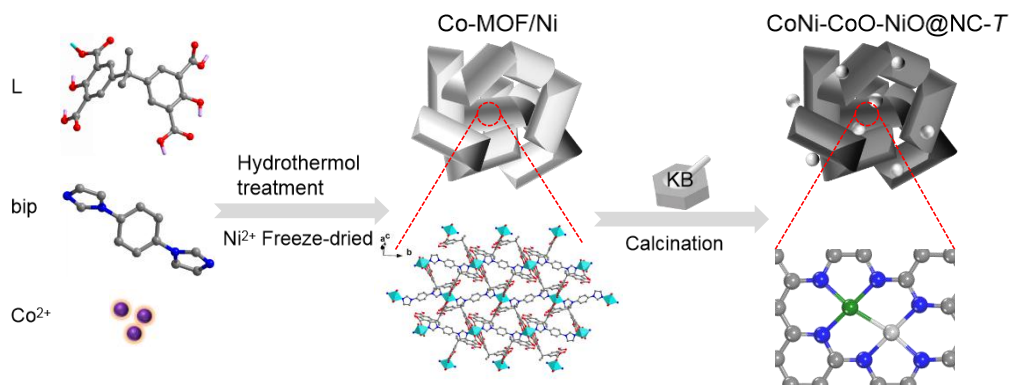

**Figure S1.** A schematic illustration for the synthesis of hierarchically porous CoNi-CoO-NiO@NC-T.

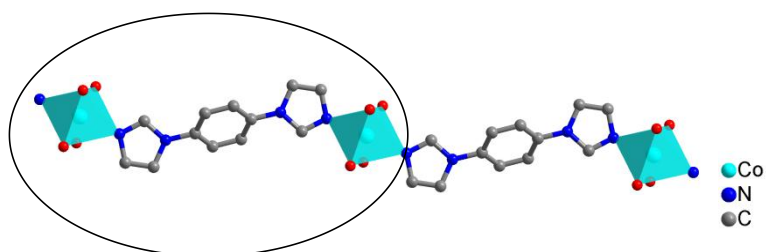

**Figure S2.** Coordination mode of 1,4-di(1H-imidazol-1-yl)benzene in Co-MOF.

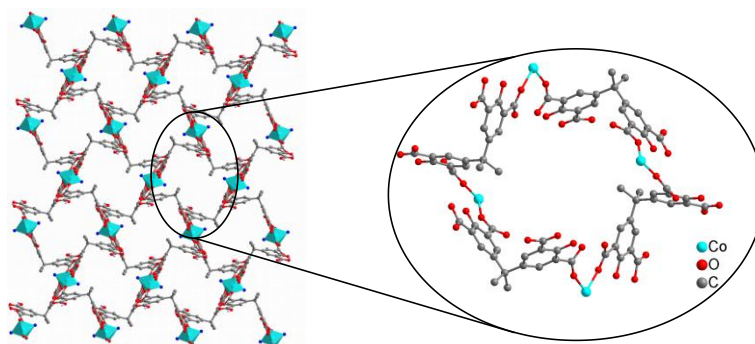

**Figure S3.** The 48-membered ring formed by four nearby H<sub>6</sub>L molecules coordinating to metal atoms in Co-MOF.

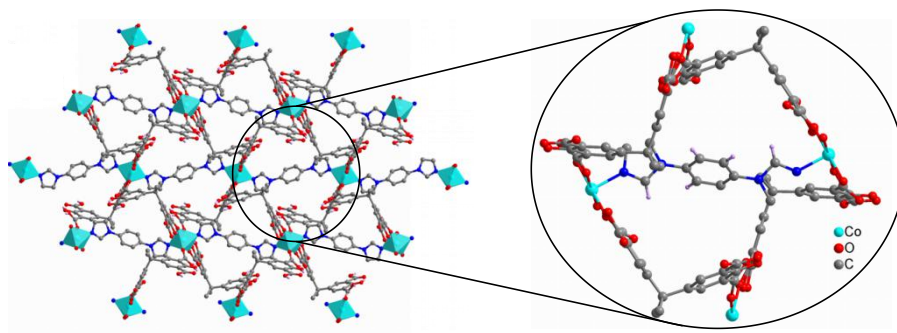

**Figure S4.** View of 2D architecture of Co-MOF.

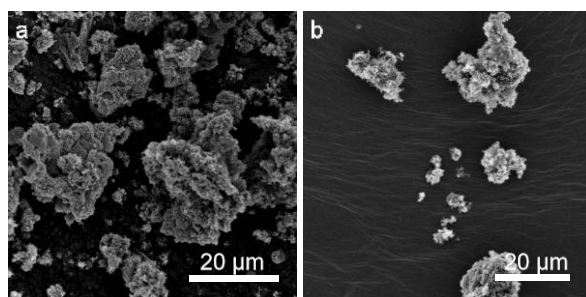

**Figure S5.** SEM images of CoNi-CoO-NiO@NC-700 (a) and CoNi-CoO-NiO@NC-900 (b).

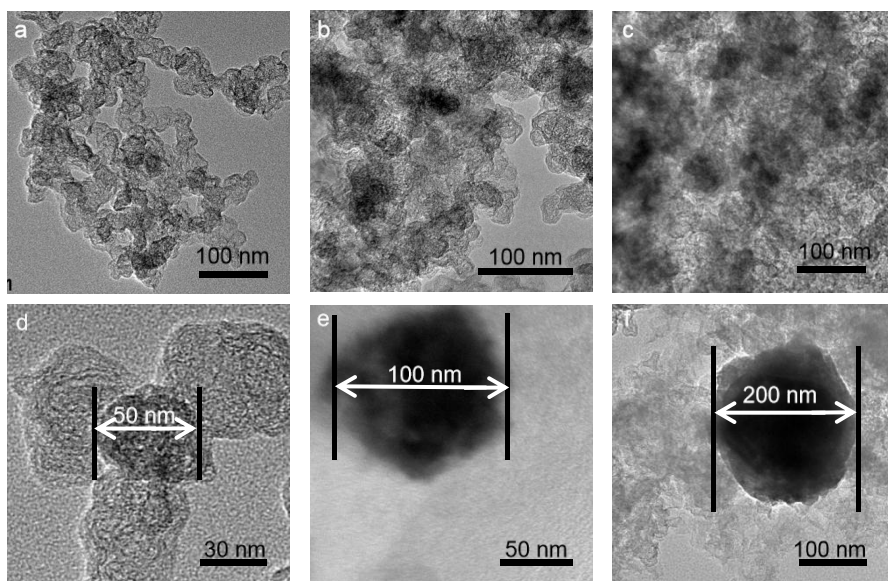

**Figure S6.** TEM images of CoNi-CoO-NiO@NC-700 (a, d),

CoNi-CoO-NiO@NC-800 (b, e), CoNi-CoO-NiO@NC-900 (c, f) after carbonization.

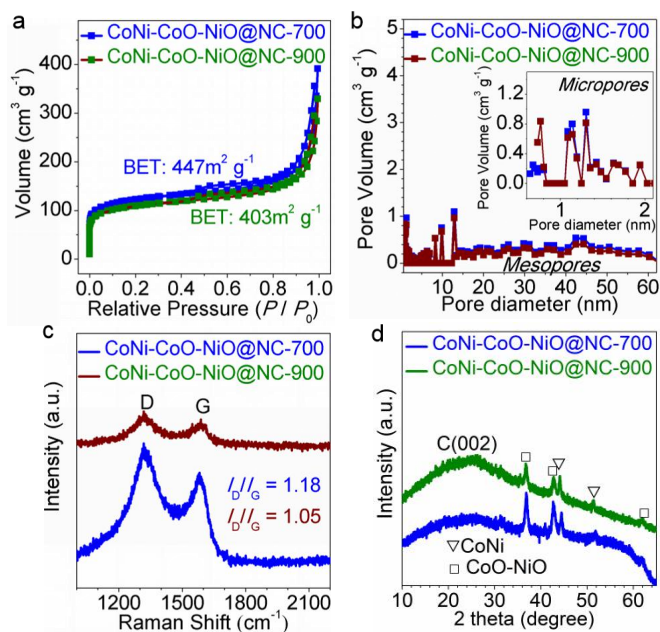

**Figure S7.** (a) N<sub>2</sub> adsorption-desorption isotherms for CoNi-CoO-NiO@NC-T (700,

900). (b) Related pore size distributions for CoNi-CoO-NiO@NC-T (700, 900).

Raman (c) and XRD (d) spectra of CoNi-CoO-NiO@NC-T (700, 900).

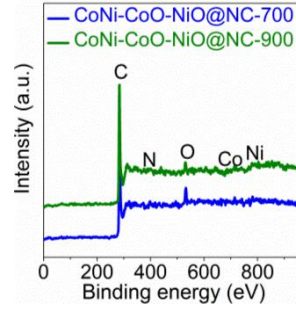

**Figure S8.** XPS spectra of CoNi-CoO-NiO@NC-T (700, 900).

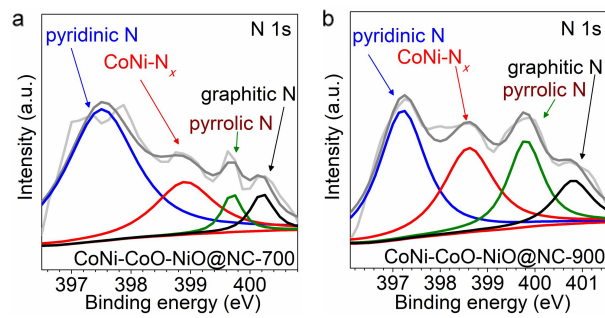

**Figure S9.** The high resolution N 1s XPS spectra of CoNi-CoO-NiO@NC-700 (a) and CoNi-CoO-NiO@NC-900 (b).

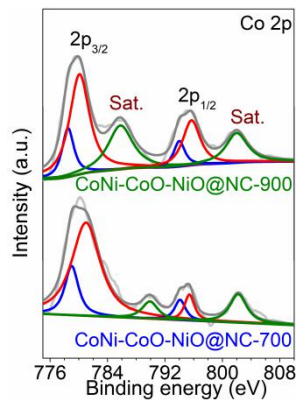

**Figure S10.** The high resolution Co 2p XPS spectra of CoNi-CoO-NiO@NC-T (700, 900).

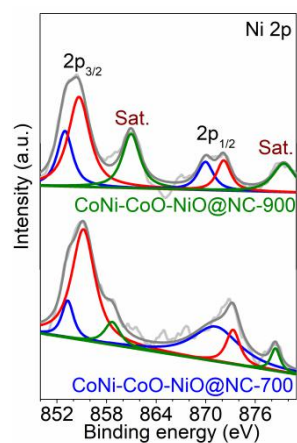

**Figure S11.** The high resolution Ni 2p XPS spectra of CoNi-CoO-NiO@NC-T (700, 900).

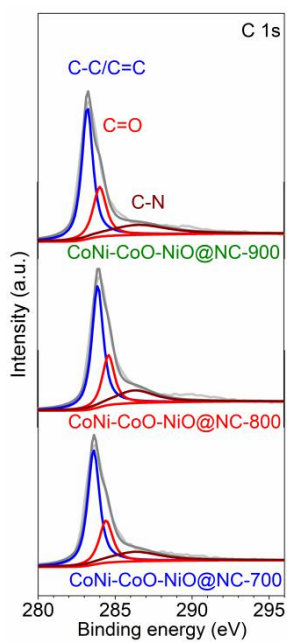

**Figure S12.** The high resolution C 1s XPS spectra of CoNi-CoO-NiO@NC-T.

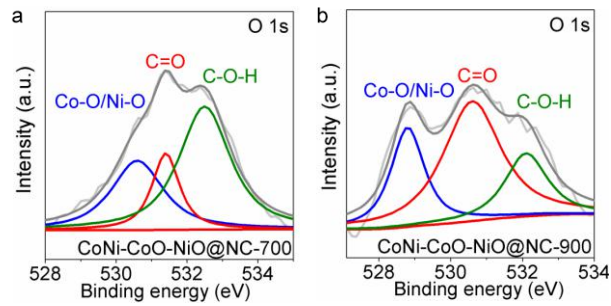

**Figure S13.** The high resolution O 1s XPS spectra of CoNi-CoO-NiO@NC-700 (a) and CoNi-CoO-NiO@NC-900 (b).

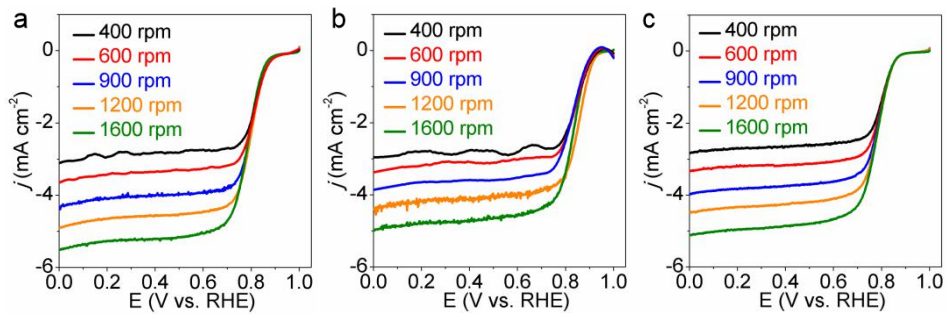

**Figure S14.** The ORR polarization curves at different rotating rates of CoNi-CoO-NiO@NC-700 (a), CoNi-CoO-NiO@NC-800 (b), and CoNi-CoO-NiO@NC-900 (c).

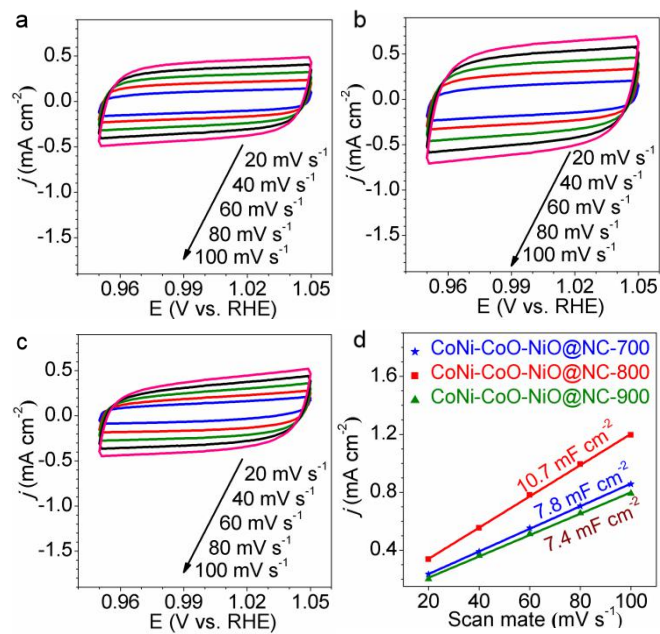

**Figure S15.** CVs for CoNi-CoO-NiO@NC-700 (a), CoNi-CoO-NiO@NC-800 (b) and CoNi-CoO-NiO@NC-900 (c) in the region of 0.95-1.05 V vs RHE. (d) The  $C_{dl}$  measured by taking CV at different scan rates.

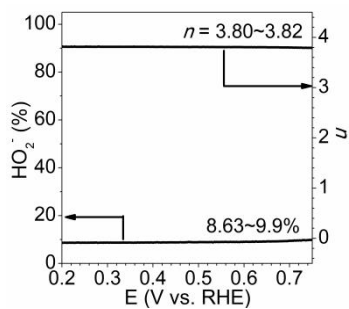

**Figure S16.**  $H_2O_2$  yield and electron transfer number of CoNi-CoO-NiO@NC-800.



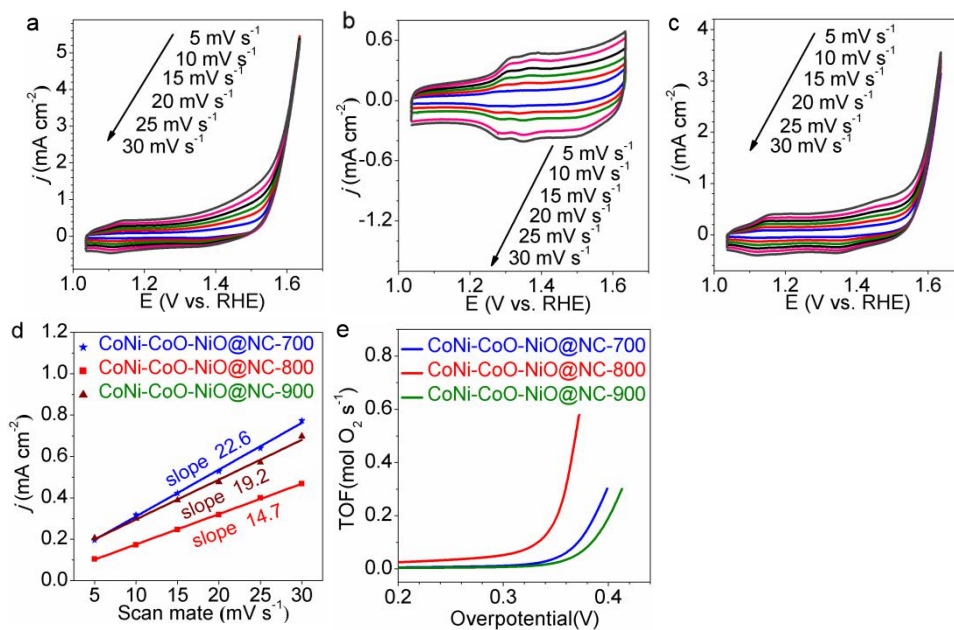

**Figure S17.** CVs for CoNi-CoO-NiO@NC-700 (a), CoNi-CoO-NiO@NC-800 (b) and CoNi-CoO-NiO@NC-900 (c) in the faradic capacitance current range at scan rates from 5 to 30  $\text{mV s}^{-1}$  in 0.1 M KOH. (d) The corresponding plot of oxidation peak current versus the scan rate from CVs. (e) Plot of TOF for CoNi-CoO-NiO@NC-T as a function of overpotential.

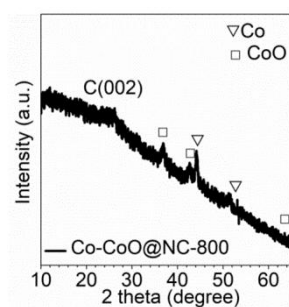

**Figure S18.** PXRD pattern of Co-CoO@NC-800.

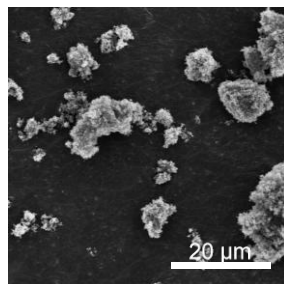

**Figure S19.** SEM image of Co-CoO@NC-800.

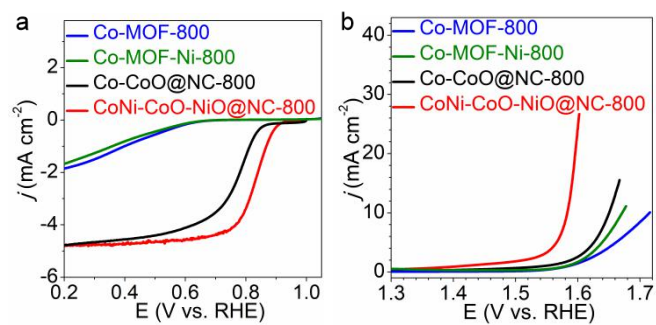

**Figure S20.** (a, b) LSV curves of samples obtained at an RDE (1600 rpm).

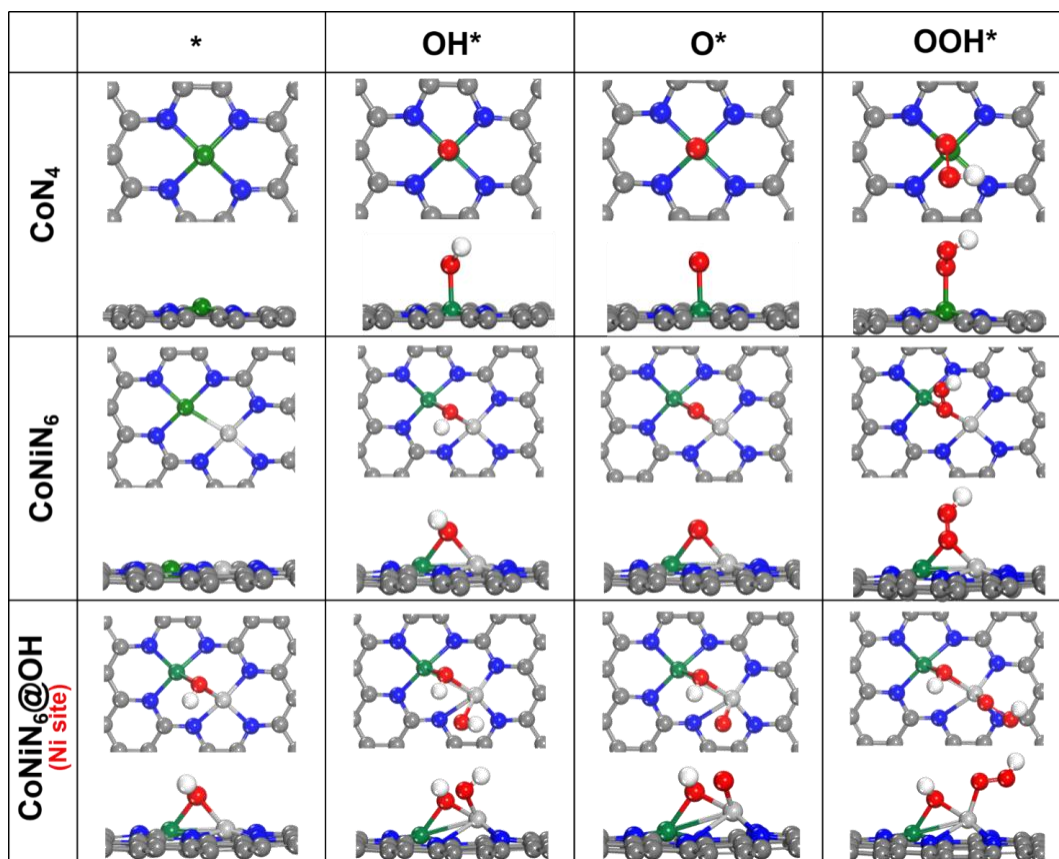

**Figure S21.** Optimized atomic configurations of oxygen intermediates (OOH\*, O\*, and OH\*) adsorbed on CoN<sub>4</sub>, CoNiN<sub>6</sub>, and CoNiN<sub>6</sub>@OH (Ni site) models.

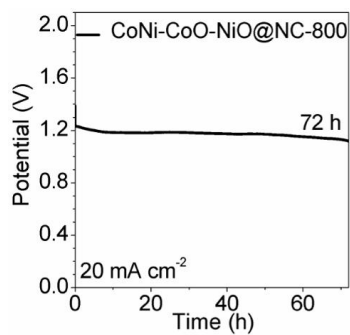

**Figure S22.** Discharging curves of the primary Zn–air batteries using CoNi-CoO-NiO@NC-800 as ORR catalyst at a current density of 20 mA cm<sup>-2</sup>.

**Table S1.** Selected bond lengths (Å) and angles (°) for Co-MOF.

| Co-MOF                                                                                                            |            |                     |            |
|-------------------------------------------------------------------------------------------------------------------|------------|---------------------|------------|
| Co(1)-N(1)#1                                                                                                      | 2.0649(15) | Co(1)-N(1)          | 2.0650(14) |
| Co(1)-O(1)#1                                                                                                      | 2.1212(12) | Co(1)-O(1)          | 2.1212(12) |
| Co(1)-O(9)#2                                                                                                      | 2.1341(12) | Co(1)-O(9)#3        | 2.1341(12) |
|                                                                                                                   |            |                     |            |
| N(1)#1-Co(1)-N(1)                                                                                                 | 180.0      | N(1)#1-Co(1)-O(1)#1 | 93.99(5)   |
| N(1)-Co(1)-O(1)#1                                                                                                 | 86.01(5)   | N(1)#1-Co(1)-O(1)   | 86.01(5)   |
| N(1)-Co(1)-O(1)                                                                                                   | 93.99(5)   | O(1)#1-Co(1)-O(1)   | 180.0      |
| N(1)#1-Co(1)-O(9)#2                                                                                               | 90.30(5)   | N(1)-Co(1)-O(9)#2   | 89.70(5)   |
| O(1)#1-Co(1)-O(9)#2                                                                                               | 97.44(5)   | O(1)-Co(1)-O(9)#2   | 82.56(5)   |
| N(1)#1-Co(1)-O(9)#3                                                                                               | 89.70(5)   | N(1)-Co(1)-O(9)#3   | 90.30(5)   |
| O(1)#1-Co(1)-O(9)#3                                                                                               | 82.56(5)   | O(1)-Co(1)-O(9)#3   | 97.44(5)   |
| O(9)#2-Co(1)-O(9)#3                                                                                               | 180.00(6)  |                     |            |
| Note: #1 -x+1,-y+1,-z; #2 x-1/2,-y+1/2,z-1/2; #3 -x+3/2,y+1/2,-z+1/2; #4<br>-x+1,-y+2,-z; #5 -x+3/2,y-1/2,-z+1/2. |            |                     |            |

**Table S2.** XPS spectra analysis for CoNi-CoO-NiO@NC-T samples.

| Sample              | C1s (%) | N1s (%) | O1s (%) | Co2p (%) | Ni2p (%) |
|---------------------|---------|---------|---------|----------|----------|
| CoNi-CoO-NiO@NC-700 | 90.98   | 2.61    | 5.53    | 0.60     | 0.28     |
| CoNi-CoO-NiO@NC-800 | 91.99   | 2.87    | 3.38    | 0.92     | 0.84     |
| CoNi-CoO-NiO@NC-900 | 92.4    | 1.96    | 4.15    | 1.02     | 0.47     |

**Table S3.** XPS spectra analysis for CoNi-CoO-NiO@NC-T samples of N 1s signal.

| Sample              | Pyridinic N        | CoNi-N <sub>x</sub> | Pyrrolic N         | Graphitic N        |
|---------------------|--------------------|---------------------|--------------------|--------------------|
| CoNi-CoO-NiO@NC-700 | 397.5 eV,<br>66.0% | 398.9 eV,<br>22.4%  | 399.7 eV,<br>5.5%  | 400.2 eV,<br>6.1%  |
| CoNi-CoO-NiO@NC-800 | 398.0 eV,<br>49.0% | 398.9 eV,<br>35.5%  | 399.5 eV,<br>6.4%  | 400.3 eV,<br>9.1%  |
| CoNi-CoO-NiO@NC-900 | 397.2 eV,<br>40.6% | 398.6 eV,<br>28.6%  | 399.8 eV,<br>20.0% | 400.8 eV,<br>10.8% |

**Table S4.** Comparison of bifunctional catalytic performance in alkaline solution between CoNi-CoO-NiO@NC-800 and other previously reported catalysts.

| Catalysts                                | OER<br>performance<br>Overpotential<br>[mV] | ORR<br>performance<br>$E_{1/2}$ [V] | $\Delta E$<br>[V] | Ref.             |
|------------------------------------------|---------------------------------------------|-------------------------------------|-------------------|------------------|
| <b>CoNi-CoO-NiO@NC-800</b>               | <b>352</b>                                  | <b>0.83</b>                         | <b>0.75</b>       | <b>This work</b> |
| Cu@NCNT/Co <sub>x</sub> O <sub>y</sub>   | 370                                         | 0.82                                | 0.78              | [1]              |
| Co@Co <sub>3</sub> O <sub>4</sub> /NC-2  | 410                                         | 0.74                                | 0.9               | [2]              |
| ZnCo-PVP-900                             | 420                                         | 0.83                                | -                 | [3]              |
| CoDNi-N/C                                | 360                                         | 0.81                                | 0.78              | [4]              |
| FeCo/NC-800                              | 440                                         | 0.8                                 | -                 | [5]              |
| Fe@N-C                                   | 480                                         | 0.83                                | -                 | [6]              |
| CuCo <sub>2</sub> O <sub>4</sub> /N-CNTs | 460                                         | 0.79                                | 0.9               | [7]              |
| 3DOM-Co@TiO <sub>x</sub> N <sub>y</sub>  | 385                                         | 0.84                                | -                 | [8]              |
| Mo-N/C@MoS <sub>2</sub>                  | 390                                         | 0.81                                | -                 | [9]              |
| Co-BTC-bipy-700                          | 400                                         | 0.79                                | 0.84              | [10]             |

**Table S5.** The  $\Delta E_{\text{ads}}$  and  $\Delta G_{\text{ads}}$  of oxygenated intermediates involved in OER/ORR processes on  $\text{CoN}_4$ ,  $\text{CoNiN}_6$ , and  $\text{CoNiN}_6@OH$ .

| Intermediates             | $\text{CoN}_4$<br>(eV) | $\text{CoNiN}_6$<br>(eV) | $\text{CoNiN}_6$ (eV)<br>(Co site) | $\text{CoNiN}_6$ (eV)<br>(Ni site) |
|---------------------------|------------------------|--------------------------|------------------------------------|------------------------------------|
| $\Delta E_{\text{OH}^*}$  | 0.82                   | -0.05                    | 0.93                               | 0.90                               |
| $\Delta G_{\text{OH}^*}$  | 0.86                   | 0.23                     | 1.59                               | 1.55                               |
| $\Delta E_{\text{O}^*}$   | 3.21                   | 0.73                     | 2.75                               | 2.64                               |
| $\Delta G_{\text{O}^*}$   | 3.16                   | 0.68                     | 2.69                               | 2.59                               |
| $\Delta E_{\text{OOH}^*}$ | 3.79                   | 3.44                     | 4.06                               | 3.80                               |
| $\Delta G_{\text{OOH}^*}$ | 3.80                   | 3.65                     | 4.42                               | 4.16                               |

**Table S6.** The Peak power density of recently reported bifunctional electrocatalysts.

| Catalyst                                  | Current density<br>(mA cm <sup>-2</sup> ) | Peak power density<br>(mW cm <sup>-2</sup> ) | Ref.             |
|-------------------------------------------|-------------------------------------------|----------------------------------------------|------------------|
| <b>CoNi-CoO-NiO@NC-800</b>                | <b>310</b>                                | <b>223</b>                                   | <b>This work</b> |
| Co <sub>4</sub> N/CNW/CC                  | 250                                       | 174                                          | [11]             |
| FeNi-NC                                   | 115                                       | 80.8                                         | [12]             |
| NCNT/CoO-NiO-NiCo                         | -                                         | 102                                          | [13]             |
| S-GNS/NiCo <sub>2</sub> S <sub>4</sub>    | -                                         | 216                                          | [14]             |
| Co-MOF                                    | 150                                       | 86.2                                         | [15]             |
| CuCo <sub>2</sub> O <sub>4</sub> /N-CNTs  | 150                                       | 83.8                                         | [7]              |
| NiO/CoN PINWs                             | 200                                       | 79.6                                         | [16]             |
| Fe <sub>0.5</sub> Ni <sub>0.5</sub> @N-GR | 150                                       | 85                                           | [17]             |
| NCNF-1000                                 | 300                                       | 185                                          | [18]             |
| Co/CoO@Co-N-C                             | 220                                       | 157                                          | [19]             |



**Table S7.** The rechargeable ZAB performance of recently reported bifunctional

ORR/OER electrocatalysts.

| Catalyst                                 | Current density<br>(mA cm <sup>-2</sup> ) | Number of<br>cycle | Voltage gap<br>increased (V) | Ref.             |
|------------------------------------------|-------------------------------------------|--------------------|------------------------------|------------------|
| <b>CoNi-CoO-NiO@NC-800</b>               | <b>2</b>                                  | <b>450</b>         | <b>0.18</b>                  | <b>This work</b> |
| NPMC-1000                                | 2                                         | 180                | 0.7                          | [20]             |
| N-GRW                                    | 2                                         | 160                | 0.16                         | [21]             |
| Fe/N-C                                   | 10                                        | 100                | 0.16                         | [6]              |
| RuO <sub>2</sub> -coated MCNAs           | 2                                         | 100                | 0.1                          | [22]             |
| Co-N,B-CSs                               | 5                                         | 128                | 1.35                         | [14]             |
| S,N-Fe/N/C-CNT                           | 5                                         | 100                | 1                            | [15]             |
| Co <sub>3</sub> O <sub>4</sub> -NP/N-rGO | 5                                         | 118                | 0.87                         | [7]              |

## Reference

1. X.L. Zhao, F.Li, R.N. Wang, J.M. Seo, H.J. Choi, S.M. Jung, J. Mahmood, I.Y. Jeon and J.B. Baek, *Adv. Funct. Mater.*, 2017, **27**, 1605717.
2. A. Aijaz, J. Masa, C. Rçsler, W. Xia, P. Weide, A.J.R. Botz, R.A. Fischer, W. Schuhmann and M. Muhler, *Angew. Chem. Int. Ed.*, 2016, **55**, 4087-4091.
3. C. Deng, K.H. Wu, J. Scott, S.M. Zhu, X.F. Zheng, R. Amal and D.W. Wang, *ACS Appl. Mater. Interfaces*, 2019, **11**, 9925-9933.
4. Z.H. Li, H.Y. He, H.B. Cao, S.M. Sun, W.L. Diao, D.L. Gao, P.L. Lu, S.S. Zhang, Z. Guo, M.J. Li, R.J. Liu, D.H. Ren, C.M. Liu, Y. Zhang, Z. Yang, J.K. Jiang and G.J. Zhang, *Appl. Catal. B Environ.*, 2019, **240**, 112-121.
5. N. Wu, Y.P. Lei, Q.C. Wang, B. Wang, C. Han and Y.D. Wang, *Nano Res.*, 2017, **10**, 2332-2343.
6. J. Wang, H.H. Wu, D.F. Gao, S. Miao, G.X. Wang and X.H. Bao, *Nano Energy*, 2015, **13**, 387-396.
7. H. Cheng, M.L. Li, C.Y. Su, N. Li and Z.Q. Liu, *Adv. Funct. Mater.*, 2017, **27**, 1701833.
8. G.H. Liu, J.D. Li, J. Fu, G.P. Jiang, G. Lui, D. Luo, Y.P. Deng, J. Zhang, Z.P. Cano, A. Yu, D. Su, Z.Y. Bai, L. Yang and Z.W. Chen, *Adv. Mater.*, 2019, **31**, 1970043.
9. I.S. Amiin, Z.H. Pu, X.B. Liu, K.A. Owusu, H.G.R. Monestel, F.O. Boakye, H.N. Zhang and S.C. Mu, *Adv. Funct. Mater.*, 2017, **27**, 1702300.
10. X.P. Sun, S.X. Sun, S.Q. Gu, Z.F. Liang, J.X. Zhang, Y.Q. Yang, Z. Deng, P. Wei, J. Peng, Y. Xu, C. Fang, Q. Li, J.T. Han, Z. Jiang and Y.H. Huang, *Nano Energy*, 2019, **61**, 245-250.
11. F.L. Meng, H.X. Zhong, D. Bao, J.M. Yan and X.B. Zhang, *J. Am. Chem. Soc.*, 2016, **138**,

10226-10231.

12. L. Yang, X.F. Zeng, D. Wang and D.P. Cao, *Energy Storage Mater.*, 2018, **12**, 277-283.
13. X.E. Liu, M. Park, M.G. Kim, S. Gupta, G. Wu and J. Cho, *Angew. Chem. Int. Ed.*, 2015, **54**, 9654-9658.
14. W.W. Liu, J. Zhang, Z.Y. Bai, G.P. Jiang, M. Li, K. Feng, L. Yang, Y.L. Ding, T.W. Yu, Z.W. Chen and A.P. Yu, *Adv. Funct. Mater.*, 2018, **28**, 1706675.
15. G.B. Chen, J. Zhang, F.X. Wang, L.L. Wang, Z.Q. Liao, E. Zschech, K. Müllen and X.L. Feng, *Chem. Eur. J.*, 2018, **24**, 18413-18418.
16. J. Yin, Y.X. Li, F. Lv, Q.H. Fan, Y.Q. Zhao, Q.L. Zhang, W. Wang, F.Y. Cheng, P.X. Xi and S.J. Guo, *ACS Nano*, 2017, **11**, 2275-2283.
17. P.T. Liu, D.Q. Gao, W. Xiao, L. Ma, K. Sun, P.X. Xi, D.S. Xue and J. Wang, *Adv. Funct. Mater.*, 2018, **28**, 1706928.
18. Q. Liu, Y.B. Wang, L.M. Dai and J.N. Yao, *Adv. Mater.*, 2016, **28**, 3000-3006.
19. X. Zhang, R.R. Liu, Y.P. Zang, G.Q. Liu, G.Z. Wang, Y.X. Zhang, H.M. Zhang and H.J. Zhao, *Chem. Commun.*, 2016, **52**, 5946-5949.
20. J.T. Zhang, Z.H. Zhao, Z.H. Xia and L.M. Dai, *Nat. Nanotechnol.*, 2015, **10**, 444-452.
21. H.B. Yang, J.W. Miao, S.F. Hung, J.Z. Chen, H.B. Tao, X.Z. Wang, L.P. Zhang, R. Chen, J.J. Gao, H.M. Chen, L.M. Dai and B. Liu, *Sci. Adv.*, 2016, **2**, e1501122.
22. Z.Y. Guo, C. Li, W.Y. Li, H. Guo, X.L. Su, P. He, Y.G. Wang and Y.Y. Xia, *J. Mater. Chem. A.*, 2016, **4**, 6282-6289.
